# Supplementary material for: A Species-Specific Cluster of Defensin-Like Genes Encodes Diffusible Pollen Tube Attractants in Arabidopsis
Source: PLoS Biol. 2012 Dec 18;10(12):e1001449. doi: 10.1371/journal.pbio.1001449 (PMC3525529; doi:10.1371/journal.pbio.1001449)
Supplement: Table S3 — Pairwise comparisons of AtLURE1 and AlLURE1 genes. (XLS) [file pbio.1001449.s012.xls]

## Sheet: Table S3
Table S3. Pairwise comparisons of AtLURE1 and AlLURE1 genes
Pairwise comparisons between AtLURE1.1 and the other paralogous AtLURE1 genes (1.2-1.5)
Full sequence (length = 90)
	AtLURE1.2	AtLURE1.3	AtLURE1.4	AtLURE1.5
AtLURE1.1	0.6963 (0.1180 0.1695)	0.5532 (0.1067 0.1928)	0.6846 (0.1176 0.1717)	0.6947 (0.1179 0.1698)
Putative mature peptide (length = 71)
	AtLURE1.2	AtLURE1.3	AtLURE1.4	AtLURE1.5
AtLURE1.1	0.6413 (0.1297 0.2023)	0.5230 (0.1224 0.2340)	0.5592 (0.1152 0.2060)	0.6392 (0.1296 0.2028)
First cysteine to last cysteine (length = 27)
	AtLURE1.2	AtLURE1.3	AtLURE1.4	AtLURE1.5
AtLURE1.1	0.1468 (0.0315 0.2143)	0.1468 (0.0315 0.2143)	0.1468 (0.0315 0.2143)	0.2233 (0.0477 0.2138)
Pairwise comparisons between five AtLURE1 genes and six AlLURE1 genes
Full sequence (length = 90)
	AlLURE1.4	AlLURE1.5	AlLURE1.6	AlLURE1.7	AlLURE1.9	AlLURE1.10
AtLURE1.1	0.8633 (0.1917 0.2221)	1.0656 (0.2007 0.1883)	0.9996 (0.2127 0.2128)	0.9660 (0.2063 0.2135)	0.9458 (0.2005 0.2120)	0.9164 (0.1944 0.2121)
AtLURE1.2	0.6451 (0.2090 0.3240)	0.8090 (0.2025 0.2503)	0.5802 (0.2032 0.3502)	0.5599 (0.1968 0.3516)	0.7344 (0.2023 0.2755)	0.6750 (0.2117 0.3136)
AtLURE1.3	0.5946 (0.2001 0.3366)	0.7420 (0.1938 0.2611)	0.5545 (0.1965 0.3543)	0.5347 (0.1902 0.3557)	0.6747 (0.1936 0.2869)	0.6220 (0.2028 0.3260)
AtLURE1.4	0.6711 (0.2207 0.3289)	0.8435 (0.2142 0.2540)	0.6041 (0.2148 0.3557)	0.5836 (0.2084 0.3571)	0.7655 (0.2140 0.2796)	0.7018 (0.2234 0.3184)
AtLURE1.5	0.6627 (0.2152 0.3247)	0.8318 (0.2087 0.2509)	0.5963 (0.2093 0.3510)	0.5758 (0.2029 0.3523)	0.7550 (0.2085 0.2761)	0.6932 (0.2178 0.3143)
Putative mature peptide (length = 71)
	AlLURE1.4	AlLURE1.5	AlLURE1.6	AlLURE1.7	AlLURE1.9	AlLURE1.10
AtLURE1.1	0.8179 (0.2131 0.2605)	1.0152 (0.2295 0.2261)	0.9661 (0.2529 0.2618)	0.9290 (0.2444 0.2631)	0.9093 (0.2369 0.2605)	0.8388 (0.2205 0.2628)
AtLURE1.2	0.6134 (0.2270 0.3700)	0.7975 (0.2236 0.2803)	0.5484 (0.2321 0.4231)	0.5260 (0.2238 0.4254)	0.7290 (0.2310 0.3169)	0.6280 (0.2345 0.3735)
AtLURE1.3	0.5791 (0.2238 0.3864)	0.7494 (0.2204 0.2940)	0.5413 (0.2315 0.4277)	0.5191 (0.2232 0.4300)	0.6867 (0.2278 0.3317)	0.5929 (0.2313 0.3901)
AtLURE1.4	0.5979 (0.2259 0.3778)	0.7785 (0.2225 0.2858)	0.5341 (0.2309 0.4324)	0.5122 (0.2227 0.4347)	0.7112 (0.2299 0.3232)	0.6120 (0.2334 0.3814)
AtLURE1.5	0.6329 (0.2349 0.3712)	0.8233 (0.2315 0.2811)	0.5655 (0.2400 0.4245)	0.5427 (0.2316 0.4267)	0.7520 (0.2389 0.3178)	0.6474 (0.2425 0.3746)
First cysteine to last cysteine (length = 27)
	AlLURE1.4	AlLURE1.5	AlLURE1.6	AlLURE1.7	AlLURE1.9	AlLURE1.10
AtLURE1.1	0.7588 (0.2007 0.2645)	0.5261 (0.1826 0.3470)	0.4214 (0.1601 0.3799)	0.4214 (0.1601 0.3799)	0.5261 (0.1826 0.3470)	0.7588 (0.2007 0.2645)
AtLURE1.2	0.6422 (0.1632 0.2542)	0.6644 (0.1361 0.2049)	0.3895 (0.1552 0.3986)	0.3895 (0.1552 0.3986)	0.6644 (0.1361 0.2049)	0.6422 (0.1632 0.2542)
AtLURE1.3	0.6422 (0.1632 0.2542)	0.6644 (0.1361 0.2049)	0.3895 (0.1552 0.3986)	0.3895 (0.1552 0.3986)	0.6644 (0.1361 0.2049)	0.6422 (0.1632 0.2542)
AtLURE1.4	0.6422 (0.1632 0.2542)	0.6644 (0.1361 0.2049)	0.3895 (0.1552 0.3986)	0.3895 (0.1552 0.3986)	0.6644 (0.1361 0.2049)	0.6422 (0.1632 0.2542)
AtLURE1.5	0.7211 (0.1828 0.2535)	0.7590 (0.1551 0.2044)	0.4388 (0.1744 0.3975)	0.4388 (0.1744 0.3975)	0.7590 (0.1551 0.2044)	0.7211 (0.1828 0.2535)
Values indicate dN/dS (dN, dS) for pairwise comparisons between AtLURE1.1 and the other paralogous AtLURE1 genes (1.2-1.5) and between five AtLURE1 genes and six AlLURE1 genes. The values were estimated using the method of Nei and Gojobori (1986) implemented in the yn00 program of the PAML version 4.5 (Yang, 2007).
